# Supplementary material for: A Comparison of Prognostic Factors in a Large Cohort of In-Hospital and Out-of-Hospital Cardiac Arrest Patients
Source: MDPI journal article supplement (doi:10.3390/life14030403), 2024-03-18
Supplement: s1 [file s1]

**Table S1.** Univariate correlation analysis for quantitative variables in in-of-hospital cardiac arrest population.

| Variable                      | Outcome at 3 months |                  | P-value |
|-------------------------------|---------------------|------------------|---------|
|                               | Good                | Bad              |         |
| n                             | 168                 | 372              |         |
| Age (years)                   | 61.7 (16.2)         | 63.7 (15.3)      | 0.003   |
| Epinephrine (mg)              | 2 [1-3]             | 3 [1 – 5]        | <0.0001 |
| Lactate on admission (mmol/L) | 4.6 [3.2 - 6.9]     | 6.4 [3.3 - 10.0] | <0.0001 |
| Time to ROSC (min)            | 8 [4 – 15]          | 15 [9 – 24]      | <0.0001 |
| Weight (Kg)                   | 80.5 (18.9)         | 78.2 (18.8)      | 0.29    |

One way ANOVA was used for normally distributed variables (Age and Weight): mean (s.d.) was reported. The non-parametric Mann Whitney U test was used for non-normally distributed variables: median [IQR] was reported.

**Table S2.** Univariate correlation analysis for categorical variables in IHCA population.

| Units of measure |                         | Factor | Group | Outcome at 3 months |            | X <sup>2</sup> | df | P-value |
|------------------|-------------------------|--------|-------|---------------------|------------|----------------|----|---------|
|                  |                         |        |       | Good                | Bad        |                |    |         |
|                  |                         | n      |       | 168                 | 372        |                |    |         |
| n (%)            | Witnessed Arrest        |        | 0     | 17 (10.1)           | 66 (17.7)  | 4.6            | 1  | 0.032   |
|                  |                         |        | 1     | 151 (90.0)          | 306 (82.3) |                |    |         |
| n (%)            | AKI                     |        | 0     | 86 (51.2)           | 134 (36)   | 0.03           | 1  | 0.001   |
|                  |                         |        | 1     | 82 (48.8)           | 238(64)    |                |    |         |
| n (%)            | Bystander CPR           |        | 0     | 16 (9.5)            | 77 (20.7)  | 9.4            | 1  | 0.002   |
|                  |                         |        | 1     | 152 (90.5)          | 295 (79.3) |                |    |         |
| n (%)            | Chronic Heart Failure   |        | 0     | 119 (70.8)          | 246 (66.1) | 0.96           | 1  | 0.32    |
|                  |                         |        | 1     | 49 (29.2)           | 126 (33.9) |                |    |         |
| n (%)            | Chronic Kidney Disease  |        | 0     | 130 (77.4)          | 267 (71.8) | 1.6            | 1  | 0.21    |
|                  |                         |        | 1     | 38 (22.6)           | 105 (28.2) |                |    |         |
| n (%)            | COPD                    |        | 0     | 135 (80.4)          | 299 (80.4) | 0              | 1  | 1       |
|                  |                         |        | 1     | 33 (19.6)           | 73 (19.6)  |                |    |         |
| n (%)            | Coronary artery disease |        | 0     | 102 (60.7)          | 240 (64.5) | 0.57           | 1  | 0.45    |
|                  |                         |        | 1     | 66 (39.3)           | 132 (35.5) |                |    |         |

|       |                                    |                                      |                                   |                                     |       |   |           |
|-------|------------------------------------|--------------------------------------|-----------------------------------|-------------------------------------|-------|---|-----------|
| n (%) | Steroids                           | 0<br>1                               | 130 (77.4)<br>38 ( 22.6)          | 265 (71.2)<br>107 (28.8)            | 1.9   | 1 | 0.17      |
| n (%) | CRRT                               | 0<br>1                               | 137 (81.5)<br>31 (18.5)           | 283 (76.1)<br>89 (23.9)             | 1.7   | 1 | 0.19      |
| n (%) | Diabetes                           | 0<br>1                               | 119 (70.8)<br>49 (29.2)           | 260 (69.9)<br>112 (30.1)            | 0.014 | 1 | 0.90      |
| n (%) | ECMO                               | 0<br>1                               | 156 (92.9)<br>12 (7.1)            | 334 (89.8)<br>38 (10.2)             | 0.96  | 1 | 0.33      |
| n (%) | ECPR                               | 0<br>1                               | 153 (91.1)<br>12 (8.9)            | 341 (91.7)<br>30 (8.3)              | 3.7   | 1 | 0.15      |
| n (%) | Haemorrhagic Events                | 0<br>1                               | 159 (94.6)<br>9 (5.4)             | 328 (88.2)<br>44 (11.8)             | 4.8   | 1 | 0.029     |
| n (%) | HIV                                | 0<br>1                               | 166 (98.8)<br>2 (1.2)             | 370 (99.5)<br>2 (0.5)               | 0.077 | 1 | 0.78      |
| n (%) | Hypertension                       | 0<br>1                               | 83 (49.4)<br>85 (50.6)            | 203 (54.6)<br>169(45.4)             | 1     | 1 | 0.31      |
| n (%) | Arterial Hypothermia               | 0<br>1                               | 96 (57.1)<br>72 (42.9)            | 184 (49.5)<br>188 (50.5)            | 2.4   | 1 | 0.12      |
| n (%) | IABP                               | 0<br>1                               | 157 (93.5)<br>11 (6.5)            | 355 (95.4)<br>17 (4.6)              | 0.56  | 1 | 0.45      |
| n (%) | Dobutamine                         | 0<br>1                               | 105 (62.5)<br>63 (37.5)           | 201 (54)<br>171 (46)                | 3     | 1 | 0.08      |
| n (%) | Vasopressors                       | 0<br>1                               | 51 (30.4)<br>117 (69.6)           | 68 (18.3)<br>304 (81.7)             | 9.1   | 1 | 0.002     |
| n (%) | Liver Cirrhosis                    | 0<br>1                               | 164(97.6)<br>4 (2.4)              | 340 (91.4)<br>32 (8.6)              | 6.2   | 1 | 0.012     |
| n (%) | Male Sex                           | 0<br>1                               | 63 (37.5)<br>105 (62.5)           | 139 (37.4)<br>233 (62.6)            | 0     | 1 | 1         |
| n (%) | Previous Neurological Disease      | 0<br>1                               | 148 (88.1)<br>20 (11.9)           | 299 (80.4)<br>73 (19.6)             | 4.3   | 1 | 0.038     |
| n (%) | Cause of cardiac arrest            | Cardiac<br>Non-cardiac               | 96 (57.1)<br>72 (42.9)            | 160 (43)<br>212 (57)                | 8.7   | 1 | 0.003     |
| n (%) | Percutaneous Coronary Intervention | 0<br>1                               | 145 (86.3)<br>23 (13.7)           | 358 (96.2)<br>14 (3.8)              | 16    | 1 | 0.0001    |
| n (%) | Presentation Rhythm                | Non-shockable<br>Shockable<br>Unkown | 72 (42.9)<br>88 (52.4)<br>8 (4.7) | 260 (69.9)<br>95 (25.5)<br>17 (4.6) | 38    | 2 | <0.0001 # |
| n (%) | Shock                              | 0<br>1                               | 96 (57.1)<br>72 (42.9)            | 146 (39.2)<br>226 (60.8)            | 14    | 1 | <0.001    |

| n (%) | Presentation Rhythm | Asystole         | 35 (20.8) | 171 (46)  | 44 | 3 | <0.0001 <sup>#</sup> |
|-------|---------------------|------------------|-----------|-----------|----|---|----------------------|
|       |                     | Shockable-Rhythm | 88 (52.4) | 95 (25.5) |    |   |                      |
|       |                     | PEA              | 37 (22)   | 89 (23.9) |    |   |                      |
|       |                     | Unkown           | 8 (4.8)   | 17 (4.6)  |    |   |                      |

Pearson  $\chi^2$  test was used for comparison between two groups; <sup>#</sup> Overall p-value (adjustment method: Bonferroni). HIV: human immunodeficiency virus; CRP: cardiopulmonary resuscitation; PEA: pulseless electrical activity; ROSC: return to spontaneous circulation; CRRT: Continuous Renal Replacement Therapy; ECMO: extracorporeal membrane oxygenation; ECPR: extracorporeal cardiopulmonary resuscitation; IABP: Intra-Aortic Balloon Pump; ICU: intensive Care Unit; AKI: acute kidney insufficiency; COPD: chronic obstructive pulmonary disease.

**Figure S1.** ROC curves for time to ROSC, age and lactate on admission for Unfavourable Outcome in IHCA population

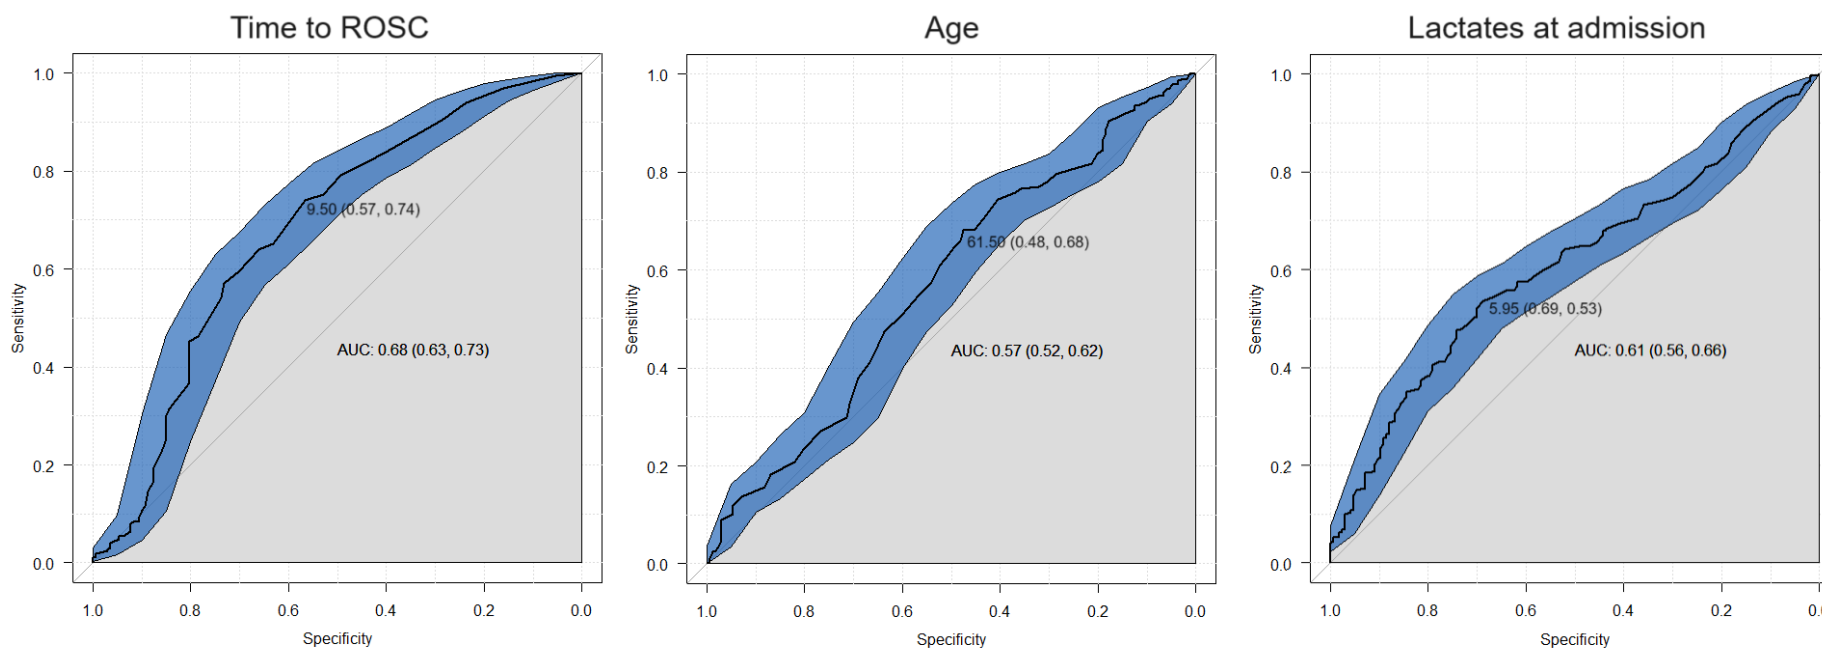

The optimal cut-off in IHCA population for time to ROSC, age and lactate on admission to predict UO were 9.5 min (Se 74%; Sp 57%; AUC 0.68 [95%CI 0.63-0.73]), 61.5 years (Se 68%, Sp 48%; AUC 0.57 [95%CI 0.52-0.63]) and 5.95 mmol/L (Se 53%, Sp 69%; AUC 0.61 [95%CI 0.56-0.66]), respectively.

**Table S3.** Univariate correlation analysis for quantitative variables in out-of-hospital cardiac arrest population.

| Factor                        | Outcome at 3 months |                  | P-value |
|-------------------------------|---------------------|------------------|---------|
|                               | Good                | Bad              |         |
|                               | n                   |                  |         |
|                               | 160                 | 407              |         |
| Age (years)                   | 57.66 (12.9)        | 63.70 (15.3)     | <0.0001 |
| Epinephrine (mg)              | 3 [1-5]             | 4 [2-7]          | <0.0001 |
| Lactate on admission (mmol/L) | 4.5 [3.6 – 7.9]     | 7.1 [3.9 – 10.9] | <0.0001 |
| Time to ROSC (min)            | 15 [10 – 25]        | 22 [15 – 30]     | <0.0001 |
| Weight (kg)                   | 76.5 [70 – 83.3]    | 77 [65.3 – 89.0] | 0.28    |

One way ANOVA was used for normally distributed variables (Age): mean (s.d.) was reported. The non-parametric Mann Whitney U test was used for non-normally distributed variables: median [IQR] was reported.

**Table S4.** Univariate correlation analysis for categorical variables in OHCA population.

| Units of measure | Factor                  | Group | Outcome at 3 months |            | X <sup>2</sup> | df | p-value |
|------------------|-------------------------|-------|---------------------|------------|----------------|----|---------|
|                  |                         |       | Good                | Bad        |                |    |         |
|                  |                         | n     | 160                 | 407        |                |    |         |
| n (%)            | Witnessed Arrest        | 0     | 32 (20)             | 146 (35.9) | 13             | 1  | <0.001  |
|                  |                         | 1     | 128 (80)            | 261 (64.1) |                |    |         |
| n (%)            | AKI                     | 0     | 91 (56.9)           | 203 (49.9) | 2              | 1  | 0.16    |
|                  |                         | 1     | 69 (43.1)           | 204 (50.1) |                |    |         |
| n (%)            | Bystander CPR           | 0     | 68 (42.5)           | 224 (55)   | 6.7            | 1  | 0.009   |
|                  |                         | 1     | 92 (57.5)           | 183 (45)   |                |    |         |
| n (%)            | Chronic Heart Failure   | 0     | 133 (83.1)          | 338 (83)   | 0              | 1  | 1       |
|                  |                         | 1     | 27 (16.9)           | 69 (17)    |                |    |         |
| n (%)            | Chronic Kidney Disease  | 0     | 151 (94.4)          | 374 (91.9) | 0.7            | 1  | 0.40    |
|                  |                         | 1     | 9 (5.6)             | 33 (8.1)   |                |    |         |
| n (%)            | COPD                    | 0     | 139 (86.9)          | 330 (81.1) | 2.3            | 1  | 0.10    |
|                  |                         | 1     | 21 (13.1)           | 77 (18.9)  |                |    |         |
| n (%)            | Coronary Artery Disease | 0     | 99 (61.9)           | 262 (64.4) | 0.21           | 1  | 0.65    |
|                  |                         | 1     | 61 (38.1)           | 145 (35.6) |                |    |         |

|       |                                    |                                       |                                    |                                   |        |   |         |
|-------|------------------------------------|---------------------------------------|------------------------------------|-----------------------------------|--------|---|---------|
| n (%) | Steroids                           | 0<br>1                                | 140 (87.5)<br>20 (12.5)            | 326 (80.1)<br>81 (19.9)           | 3.8    | 1 | 0.051   |
| n (%) | CRRT                               | 0<br>1                                | 147 (91.9)<br>13 (8.1)             | 367 (90.2)<br>40 (9.8)            | 0.23   | 1 | 0.63    |
| n (%) | Diabetes                           | 0<br>1                                | 136 (85)<br>24 (15)                | 326 (80.1)<br>81 (19.9)           | 1.5    | 1 | 0.22    |
| n (%) | ECMO                               | 0<br>1                                | 145 (90.6)<br>15 (9.4)             | 356 (87.5)<br>51 (12.5)           | 0.83   | 1 | 0.36    |
| n (%) | ECPR                               | 0<br>1                                | 150 (93.7)<br>10 (6.3)             | 371 (91.2)<br>36 (8.8)            | 0.61   | 1 | 0.44    |
| n (%) | Hemorrhagic Events                 | 0<br>1                                | 151 (94.4)<br>9 (5.6)              | 382 (93.9)<br>25 (6.1)            | 0.0014 | 1 | 0.97    |
| n (%) | HIV                                | 0<br>1                                | 159 (99.4)<br>1 (0.6)              | 406 (99.7)<br>1 (0.3)             | 0.23   | 1 | 0.63    |
| n (%) | Arterial Hypertension              | 0<br>1                                | 100 (62.5)<br>60 (37.5)            | 250 (61.4)<br>157 (38.6)          | 0.02   | 1 | 0.89    |
| n (%) | Hypothermia                        | 0<br>1                                | 35 (21.9)<br>125 (78.1)            | 112 (27.5)<br>295 (72.5)          | 1.6    | 1 | 0.20    |
| n (%) | IABP                               | 0<br>1                                | 153 (95.6)<br>7 (4.4)              | 392 (96.3)<br>15 (3.7)            | 0.02   | 1 | 0.89    |
| n (%) | Dobutamine                         | 0<br>1                                | 101 (63.1)<br>59 (36.9)            | 234 (57.5)<br>173 (42.5)          | 1.3    | 1 | 0.26    |
| n (%) | Vasopressors                       | 0<br>1                                | 66 (41.2)<br>94 (58.8)             | 86 (21.1)<br>321 (78.9)           | 23     | 1 | <0.0001 |
| n (%) | Liver Cirrhosis                    | 0<br>1                                | 159 (99.4)<br>1 (0.6)              | 391 (96.1)<br>16 (3.9)            | 3.3    | 1 | 0.07    |
| n (%) | Male Sex                           | 0<br>1                                | 40 (25)<br>120 (75)                | 137 (33.7)<br>270 (66.3)          | 3.6    | 1 | 0.057   |
| n (%) | Previous Neurological Disease      | 0<br>1                                | 146 (91.2)<br>14 (8.8)             | 339 (83.3)<br>68 (16.7)           | 5.3    | 1 | 0.022   |
| n (%) | Cause of cardiac arrest            | Cardiac<br>Non-cardiac                | 125 (78.1)<br>35 (21.9)            | 231 (56.8)<br>176 (43.2)          | 22     | 1 | 0.07    |
| n (%) | Percutaneous Coronary Intervention | 0<br>1                                | 103 (64.4)<br>57 (35.6)            | 347 (85.3)<br>60 (14.7)           | 29     | 1 | <0.0001 |
| n (%) | Presentation Rhythm                | Non-shockable<br>Shockable<br>Unknown | 36 (22.6)<br>123 (76.8)<br>1 (0.6) | 267 (65.6)<br>132 (32.4)<br>8 (2) | 17     | 1 | <0.0001 |
| n (%) | Shock                              | 0                                     | 114 (71.2)                         | 211 (51.8)                        | 17     | 1 | <0.0001 |

| n (%) | Presentation Rhythm | 1 | 46 (28.8)  | 196 (48.2) | 95 | 3 | <0.0001 <sup>#</sup> |
|-------|---------------------|---|------------|------------|----|---|----------------------|
|       | Shockable Rhythm    |   | 123 (76.8) | 132 (32.4) |    |   |                      |
|       | Asystole            |   | 26 (16.3)  | 209 (51.3) |    |   |                      |
|       | PEA                 |   | 10 (6.3)   | 58 (14.3)  |    |   |                      |
|       | Unkown              |   | 1 (0.6)    | 8 (2)      |    |   |                      |

Pearson  $\chi^2$  test was used for comparison between two groups; <sup>#</sup> Overall p-value (adjustment method: Bonferroni). HIV: human immunodeficiency virus; CRP: cardiopulmonary resuscitation; PEA: pulseless electrical activity; ROSC: return to spontaneous circulation; CRRT: Continuous Renal Replacement Therapy; ECMO: extracorporeal membrane oxygenation; ECPR: extracorporeal cardiopulmonary resuscitation; IABP: Intra-Aortic Balloon Pump; ICU: intensive Care Unit; AKI: acute kidney insufficiency; COPD: chronic obstructive pulmonary disease.

**Figure S2.** ROC curves for time to ROSC, age and lactate on admission for Unfavourable Outcome in OHCA population

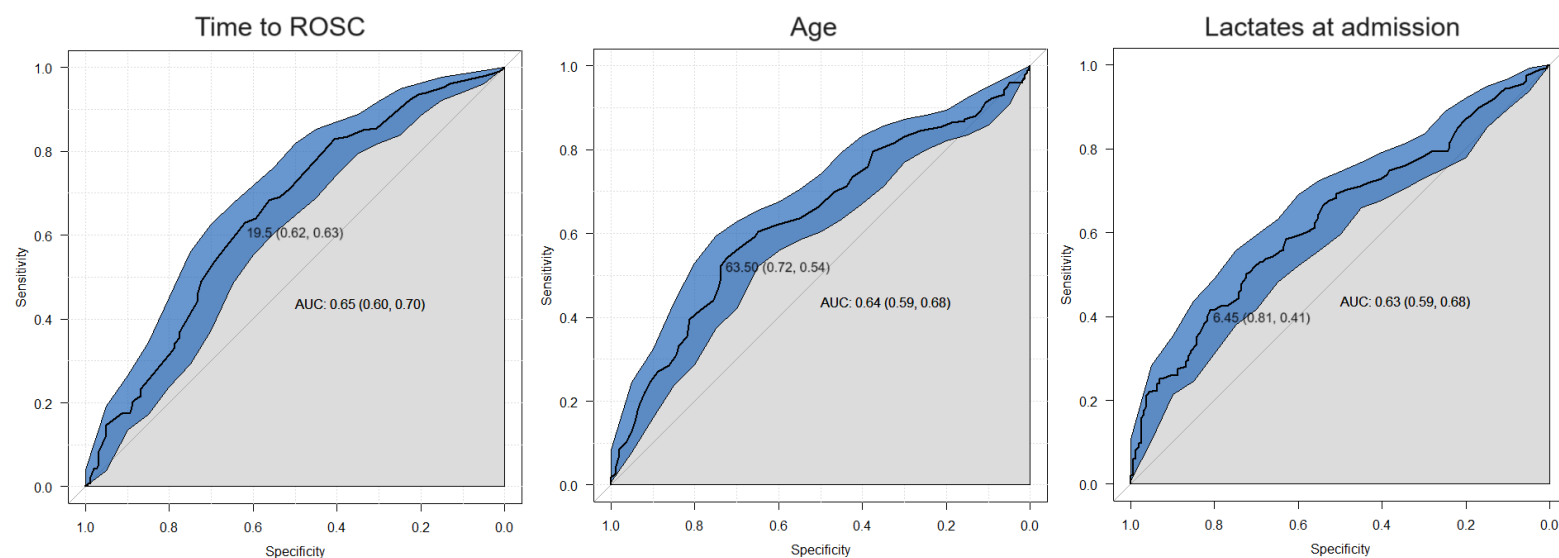

The optimal cut-off for OHCA population for time to ROSC, age, and lactate on admission to predict UO were 19.5 min (Se 63%; Sp 62%; AUC 0.65 [95%CI 0.60-0.70]), 63.5 years (Se 54%, Sp 72%; AUC 0.64 [95%CI 0.59-0.68]) and 6.45 mmol/L (Se 41%, Sp 81%; AUC 0.63 [95%CI 0.58-0.68]), respectively.

**Table S5.** Univariate correlation analysis for quantitative variables in overall cohort.

| Factor                        | Outcome at 3 months  |                      | P-value |
|-------------------------------|----------------------|----------------------|---------|
|                               | Good                 | Bad                  |         |
| n                             | 328                  | 779                  |         |
| Age                           | 59.71 (14.76)        | 64.70 (15.01)        | <0.0001 |
| Epinephrine (mg)              | 2.00 [1.00-4.00]     | 3.00 [2.00, 6.00]    | <0.0001 |
| Lactate on admission (mmol/L) | 4.55 [3.30, 7.27]    | 6.80 [3.70, 10.30]   | <0.0001 |
| Time to ROSC (min)            | 11.00 [5.00, 20.00]  | 20.00 [11.50, 28.00] | <0.0001 |
| Weight (kg)                   | 77.00 [68.00, 88.00] | 77.00 [65.00, 89.00] | 0.83    |

One way ANOVA was used for normally distributed variables (Age): mean (s.d.) was reported. The non-parametric Mann

Whitney U test was used for non-normally distributed variables: median [IQR] was reported.

**Table S6.** Univariate correlation analysis for categorical variables in overall cohort

| Units of measure |                        | Factor | Group      | Outcome at 3 months |      | X <sup>2</sup> | df | P-value |
|------------------|------------------------|--------|------------|---------------------|------|----------------|----|---------|
|                  |                        |        |            | Good                | Bad  |                |    |         |
| n                |                        |        |            | 328                 | 779  |                |    |         |
| n (%)            | Witnessed CA           | 0      | 49 (14.9)  | 212 (27.2)          | 19   | 1              |    | <0.0001 |
|                  |                        | 1      | 279 (85.1) | 567 (72.8)          |      |                |    |         |
| n (%)            | AKI                    | 0      | 177 (54)   | 337 (43.3)          | 10   | 1              |    | 0.001   |
|                  |                        | 1      | 151 (46)   | 442 (56.7)          |      |                |    |         |
| n (%)            | Bystander CPR          | 0      | 84 (25.6)  | 301 (38.6)          | 17   | 1              |    | <0.0001 |
|                  |                        | 1      | 244 (74.4) | 478 (61.4)          |      |                |    |         |
| n (%)            | Chronic Heart Failure  | 0      | 252 (76.8) | 584 (75)            | 0.34 | 1              |    | 0.56    |
|                  |                        | 1      | 76 (23.2)  | 195 (25)            |      |                |    |         |
| n (%)            | Chronic Kidney Disease | 0      | 281 (85.7) | 641 (82.3)          | 1.7  | 1              |    | 0.2     |
|                  |                        | 1      | 47 (14.3)  | 138 (17.7)          |      |                |    |         |
| n (%)            | COPD                   | 0      | 274 (83.5) | 629 (80.7)          | 1    | 1              |    | 0.31    |
|                  |                        | 1      | 54 (16.5)  | 150 (19.3)          |      |                |    |         |

|       |                                    |               |            |            |      |   |         |
|-------|------------------------------------|---------------|------------|------------|------|---|---------|
| n (%) | Coronary Artery Disease            | 0             | 201 (61.3) | 502 (64.4) | 0.86 | 1 | 0.35    |
|       |                                    | 1             | 127 (38.7) | 277 (35.6) |      |   |         |
| n (%) | Steroids                           | 0             | 270 (82.3) | 591 (75.9) | 5.2  | 1 | 0.02    |
|       |                                    | 1             | 58 (17.7)  | 188 (24.1) |      |   |         |
| n (%) | CRRT                               | 0             | 284 (86.6) | 649 (83.4) | 1.5  | 1 | 0.22    |
|       |                                    | 1             | 44 (13.4)  | 129 (16.6) |      |   |         |
| n (%) | Diabetes                           | 0             | 255 (77.7) | 586 (75.2) | 0.67 | 1 | 0.40    |
|       |                                    | 1             | 73 (22.3)  | 193 (24.8) |      |   |         |
| n (%) | ECMO                               | 0             | 301 (91.8) | 690 (88.6) | 2.2  | 1 | 0.14    |
|       |                                    | 1             | 27 (8.2)   | 89 (11.4)  |      |   |         |
| n (%) | ECPR                               | 0             | 299 (93.1) | 711 (91.5) | 0.62 | 1 | 0.43    |
|       |                                    | 1             | 22 (6.9)   | 66 (8.5)   |      |   |         |
| n (%) | Hemorrhagic Events                 | 0             | 310 (94.5) | 710 (91.1) | 3.2  | 1 | 0.07    |
|       |                                    | 1             | 18 (5.5)   | 69 (8.9)   |      |   |         |
| n (%) | HIV                                | 0             | 325 (99.1) | 776 (99.6) | 0.42 | 1 | 0.52    |
|       |                                    | 1             | 3 (0.9)    | 3 (0.4)    |      |   |         |
| n (%) | Arterial Hypertension              | 0             | 183 (55.8) | 453 (58.2) | 0.43 | 1 | 0.51    |
|       |                                    | 1             | 145 (44.2) | 326 (41.8) |      |   |         |
| n (%) | Hypothermia                        | 0             | 131 (39.9) | 296 (38)   | 0.29 | 1 | 0.60    |
|       |                                    | 1             | 197 (60.1) | 483 (62.0) |      |   |         |
| n (%) | IABP                               | 0             | 310 (94.5) | 747 (95.9) | 0.72 | 1 | 0.39    |
|       |                                    | 1             | 18 (5.5)   | 32 (4.1)   |      |   |         |
| n (%) | Dobutamine                         | 0             | 206 (62.8) | 435 (55.8) | 4.3  | 1 | 0.038   |
|       |                                    | 1             | 122 (37.2) | 344 (44.2) |      |   |         |
| n (%) | Vasopressors                       | 0             | 117 (35.7) | 154 (19.8) | 31   | 1 | <0.0001 |
|       |                                    | 1             | 211 (64.3) | 625 (80.2) |      |   |         |
| n (%) | Liver Cirrhosis                    | 0             | 323 (98.5) | 731 (93.8) | 9.9  | 1 | 0.002   |
|       |                                    | 1             | 5 (1.5)    | 48 (6.2)   |      |   |         |
| n (%) | Male Sex                           | 0             | 103 (31.4) | 276 (35.4) | 1.5  | 1 | 0.22    |
|       |                                    | 1             | 225 (68.6) | 503 (64.6) |      |   |         |
| n (%) | Previous Neurological Disease      | 0             | 294 (89.6) | 638 (81.9) | 9.8  | 1 | 0.001   |
|       |                                    | 1             | 34 (10.4)  | 141 (18.1) |      |   |         |
| n (%) | Cause of cardiac arrest            | Cardiac       | 221 (67.4) | 391 (50.2) | 27   | 1 | <0.0001 |
|       |                                    | Non-cardiac   | 107 (32.6) | 388 (49.8) |      |   |         |
| n (%) | Site of Cardiac Arrest             | IHCA          | 168 (51.2) | 372 (47.8) | 0.98 | 1 | 0.32    |
|       |                                    | OHCA          | 160 (48.8) | 407 (52.2) |      |   |         |
| n (%) | Percutaneous Coronary Intervention | 0             | 248 (75.6) | 705 (90.5) | 42   | 1 | <0.0001 |
|       |                                    | 1             | 80 (24.4)  | 74 (9.5)   |      |   |         |
| n (%) | Presentation Rhythm                | Non-shockable | 108 (33)   | 527 (67.7) | 120  | 1 | <0.0001 |
|       |                                    | Shockable     | 211 (64.3) | 227 (29.1) |      |   |         |



|       |                                                 |           |            |            |     |   |                      |
|-------|-------------------------------------------------|-----------|------------|------------|-----|---|----------------------|
|       |                                                 | Unknown   | 9 (2.7)    | 25 (3.2)   |     |   |                      |
| n (%) | Shock                                           | 0         | 210 (64.0) | 357 (45.8) | 30  | 1 | <0.0001              |
|       |                                                 | 1         | 118 (36.0) | 422 (54.2) |     |   |                      |
| n (%) | Presentation Rhythm                             | Shockable | 211 (64.3) | 227 (29.1) | 128 | 3 | <0.0001 <sup>#</sup> |
|       |                                                 | Asystole  | 61 (18.6)  | 380 (48.8) |     |   |                      |
|       |                                                 | PEA       | 47 (14.3)  | 147 (18.9) |     |   |                      |
|       |                                                 | Unkown    | 9 (2.7)    | 25 (3.2)   |     |   |                      |
| n (%) | Age according to ROC threshold                  | <63.5     | 199 (60.7) | 318 (40.8) | 36  | 1 | <0.0001              |
|       |                                                 | ≥ 63.5    | 129 (39.3) | 461 (59.2) |     |   |                      |
| n (%) | Lactate on admission according to ROC threshold | <6.75     | 234 (71.8) | 380 (49.6) | 45  | 1 | <0.0001              |
|       |                                                 | ≥ 6.75    | 92 (28.2)  | 386 (50.4) |     |   |                      |
| n (%) | Time to ROSC according to ROC threshold         | < 13.5    | 188 (57.3) | 230 (29.5) | 75  | 1 | <0.0001              |
|       |                                                 | ≥ 13.5    | 140 (42.7) | 549 (70.5) |     |   |                      |

Pearson X2 test was used for comparison between two groups; <sup>#</sup> Overall p-value (adjustment method: Bonferroni). HIV: human immunodeficiency virus; CRP: cardiopulmonary resuscitation; PEA: pulseless electrical activity; ROSC: return to spontaneous circulation; CRRT: Continuous Renal Replacement Therapy; ECMO: extracorporeal membrane oxygenation; ECPR: extracorporeal cardiopulmonary resuscitation; IABP: Intra-Aortic Balloon Pump; ICU: intensive Care Unit; AKI: acute kidney insufficiency; COPD: chronic obstructive pulmonary disease.

**Table S7.** Multivariate logistic regression for overall cohort.

| VARIABLE                            | Complete Logistic Multivariate Model |       |       |         | Final Model (Stepwise back-/forward based on AIC) |       |       |         |
|-------------------------------------|--------------------------------------|-------|-------|---------|---------------------------------------------------|-------|-------|---------|
|                                     | OR                                   | IC95% |       | p-value | OR                                                | IC95% |       | p-value |
| Witnessed CA [T.1]                  | 0.478                                | 0.319 | 0.717 | <0.001  | 0.491                                             | 0.330 | 0.731 | <0.001  |
| Time to ROSC (min)                  | 1.030                                | 1.020 | 1.050 | <0.0001 | 1.030                                             | 1.020 | 1.050 | <0.0001 |
| Site of Cardiac Arrest [OHCA]       | 1.300                                | 0.924 | 1.840 | 0.13    | 1.300                                             | 0.934 | 1.810 | 0.12    |
| Non-cardiac cause [T.1]             | 1.790                                | 1.280 | 2.510 | <0.001  | 1.800                                             | 1.290 | 2.500 | <0.001  |
| Previous Neurological disease [T.1] | 1.880                                | 1.180 | 2.990 | 0.007   | 1.930                                             | 1.220 | 3.050 | 0.005   |
| Lactate on admission (mmol/L)       | 1.090                                | 1.040 | 1.140 | <0.001  | 1.090                                             | 1.040 | 1.130 | <0.001  |
| Liver Cirrhosis [T.1]               | 3.000                                | 1.100 | 8.210 | 0.032   | 3.020                                             | 1.110 | 8.160 | 0.03    |
| Presentation Rhythm [Shockable]     |                                      |       |       | #       |                                                   |       |       | #       |
| Presentation Rhythm [T.Asystole]    | 4.920                                | 3.410 | 7.100 | <0.0001 | 4.910                                             | 3.410 | 7.060 | <0.0001 |
| Presentation Rhythm [T.PEA]         | 2.120                                | 1.370 | 3.270 | <0.001  | 2.140                                             | 1.390 | 3.290 | <0.001  |
| Presentation Rhythm [T.Unknown]     | 2.680                                | 1.100 | 6.510 | 0.029   | 2.520                                             | 1.060 | 6.030 | 0.04    |
| Shock [T.1]                         | 1.770                                | 1.260 | 2.490 | 0.001   | 1.800                                             | 1.310 | 2.470 | <0.001  |
| Age (years)                         | 1.030                                | 1.020 | 1.050 | <0.0001 | 1.040                                             | 1.020 | 1.050 | <0.0001 |

|                                                  |                                        |       |       |       |                                       |   |   |
|--------------------------------------------------|----------------------------------------|-------|-------|-------|---------------------------------------|---|---|
| <b>Male Sex [T.1]</b>                            | 0.899                                  | 0.647 | 1.250 | 0.52  | -                                     | - | - |
| <b>CRRT [T.1]</b>                                | 0.895                                  | 0.551 | 1.460 | 0.655 | -                                     | - | - |
| <b>Chronic Kidney Disease [T.1]</b>              | 0.915                                  | 0.568 | 1.470 | 0.71  | -                                     | - | - |
| <b>HIV [T.1]</b>                                 | 0.409                                  | 0.068 | 2.470 | 0.33  | -                                     | - | - |
| <b>ECMO [T.1]</b>                                | 0.932                                  | 0.519 | 1.680 | 0.81  | -                                     | - | - |
| <b>Steroids [T.1]</b>                            | 1.060                                  | 0.714 | 1.580 | 0.77  | -                                     | - | - |
| <b>AKI [T.1]</b>                                 | 1.260                                  | 0.892 | 1.770 | 0.191 | -                                     | - | - |
| <b>Hemorrhagic Events[T.1]</b>                   | 0.901                                  | 0.483 | 1.680 | 0.74  | -                                     | - | - |
|                                                  |                                        |       |       |       |                                       |   |   |
| <b>Null deviance</b>                             | 1330.7 on 1090 degrees of freedom      |       |       |       | 1331.4 on 1091 degrees of freedom     |   |   |
| <b>Residual deviance</b>                         | 1034.8 on 1069 degrees of freedom      |       |       |       | 1039.9 on 1079 degrees of freedom     |   |   |
| <b>AIC</b>                                       | 1079                                   |       |       |       | 1066                                  |   |   |
| <b>Hosmer and Lemeshow goodness of fit (GOF)</b> | $\chi^2 = 7.5$ , df = 8, p-value = 0.5 |       |       |       | $\chi^2 = 10$ , df = 8, p-value = 0.2 |   |   |
| <b>AUC Model's ROC curve</b>                     | 0.807 [95% CI 0.78 - 0.834]            |       |       |       | 0.805 [95% CI 0.777 - 0.832]          |   |   |

Complete regression analysis and final reduced model after stepwise back/forward selection based on Akaike Information Criterion (AIC). Overall p value for Presentation Rhythm: <0.0001. Longer time to ROSC, older age, higher lactate on admission, an unwitnessed CA, a presentation non-shockable rhythm, a non-cardiac cause of CA, the occurrence of shock, the presence of previous neurological disease, the presence of liver cirrhosis were independent predictors of UO. HIV: human immunodeficiency virus; PEA: pulseless electrical activity; ROSC: return to spontaneous circulation; CRRT: Continuous Renal Replacement Therapy; ECMO: extracorporeal membrane oxygenation; AKI: acute kidney insufficiency.

**Figure S3.** ROC curve for Generalised Logistic Model for overall population

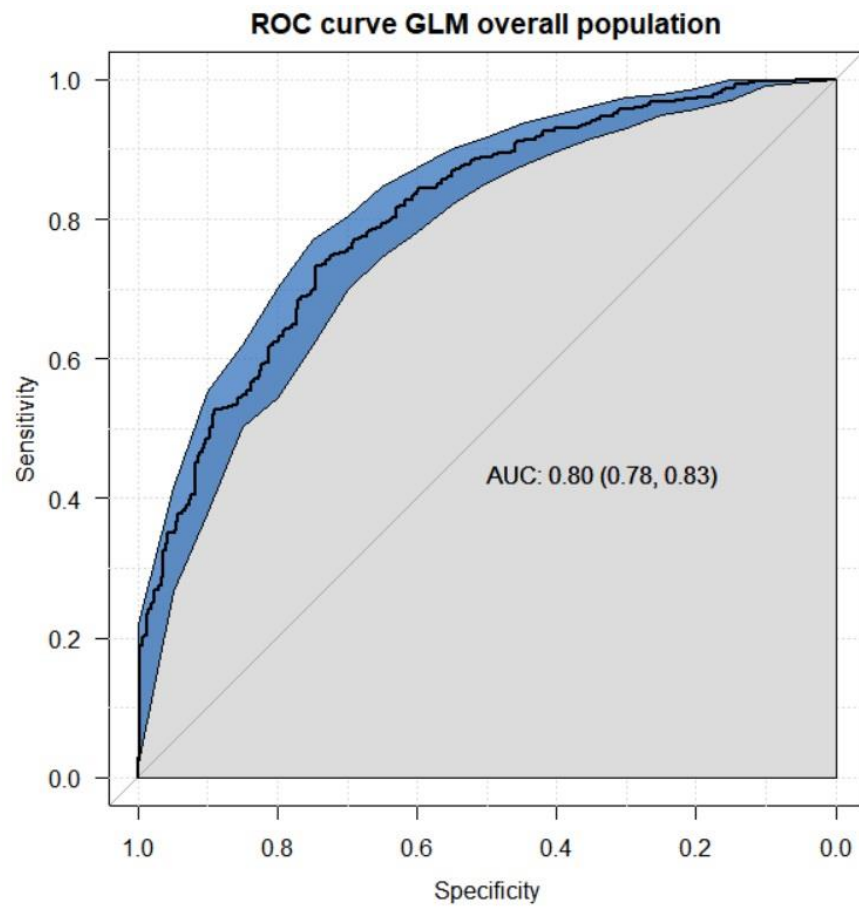

The ROC curve to assess the discriminatory ability of the model was 0.805 [95% CI 0.777 - 0.832].
